# Supplementary material for: A fluorinated cross-linked polystyrene with good dielectric properties at high frequency derived from bio-based vanillin
Source: Royal Society of Chemistry journal article supplement (doi:10.1039/d2py00574c), 2022-01-01
Supplement: d2py00574c1.pdf [file d2py00574c1.pdf]

Supporting Information for

# A Fluorinated Cross-linked Polystyrene with Good Dielectric Properties at High Frequency Derived from Bio-based Vanillin

Menglu Dai,<sup>†</sup> Jing Sun,<sup>\*,†</sup> and Qiang Fang<sup>\*,†</sup>

<sup>†</sup>Key Laboratory of Synthetic and Self-Assembly Chemistry for Organic Functional Molecules, Shanghai Institute of Organic Chemistry, Chinese Academy of Sciences, 345 Lingling Road, Shanghai 200032, P. R. China. E-mail: qiangfang@mail.sioc.ac.cn, [sunjing@sioc.ac.cn](mailto:sunjing@sioc.ac.cn)

## Contents:

### Characterizations

**Fig. S1** <sup>1</sup>H NMR spectrum of monomer **M** (400 MHz, CDCl<sub>3</sub>).

**Fig. S2** <sup>13</sup>C NMR spectra of monomer **M** (126 MHz, CDCl<sub>3</sub>).

**Fig. S3** <sup>19</sup>F NMR spectrum of monomer **M** (376 MHz, CDCl<sub>3</sub>).

**Fig. S4** The stress–strain curves of **P** at room temperature.

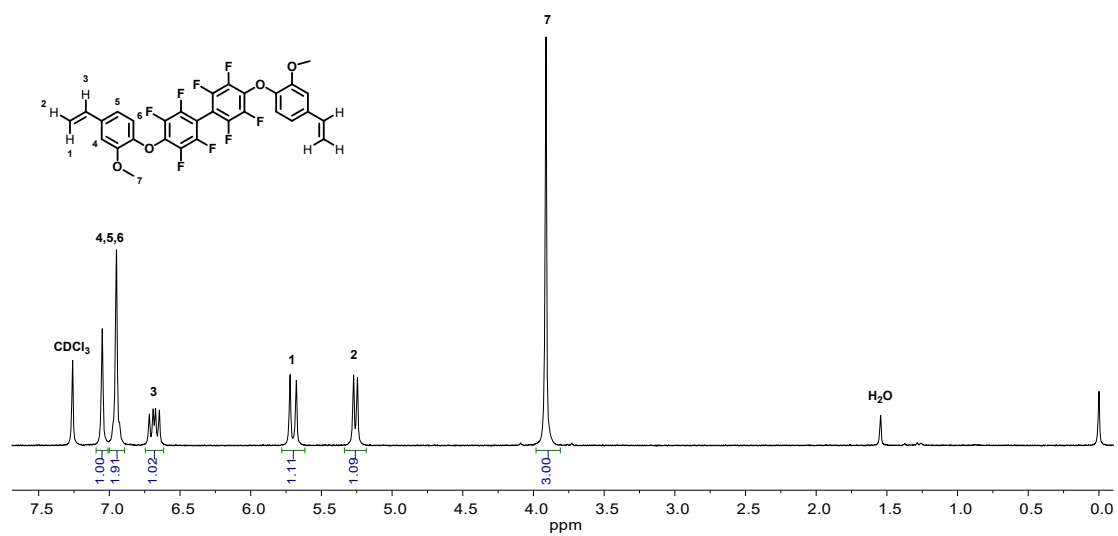

**Fig. S1**  $^1\text{H}$  NMR spectrum of monomer **M** (400 MHz,  $\text{CDCl}_3$ ).

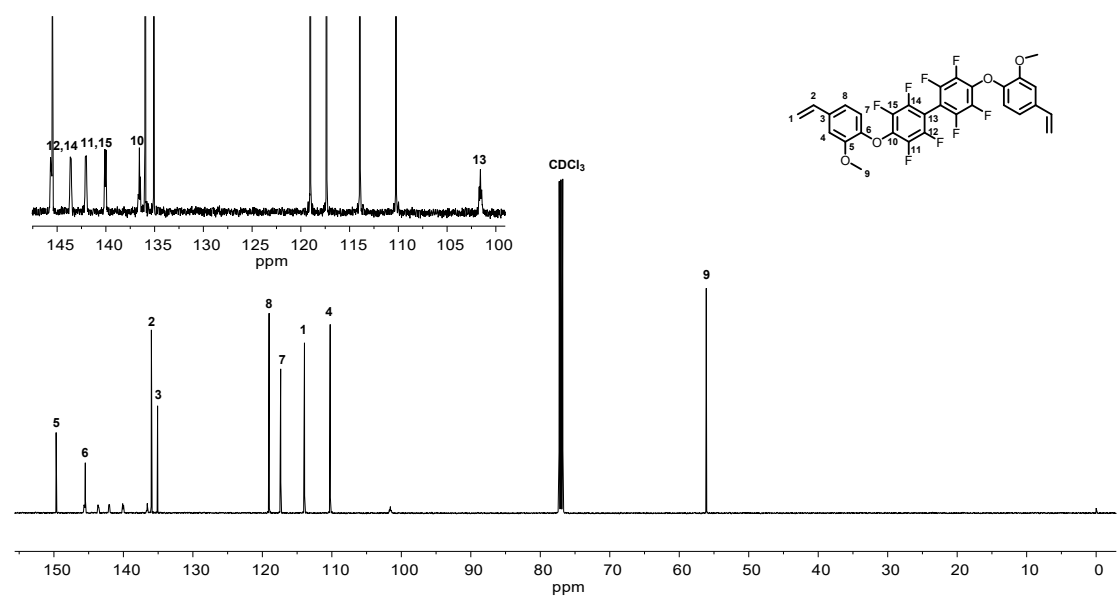

**Fig. S2**  $^{13}\text{C}$  NMR spectra of monomer **M** (126 MHz,  $\text{CDCl}_3$ ).

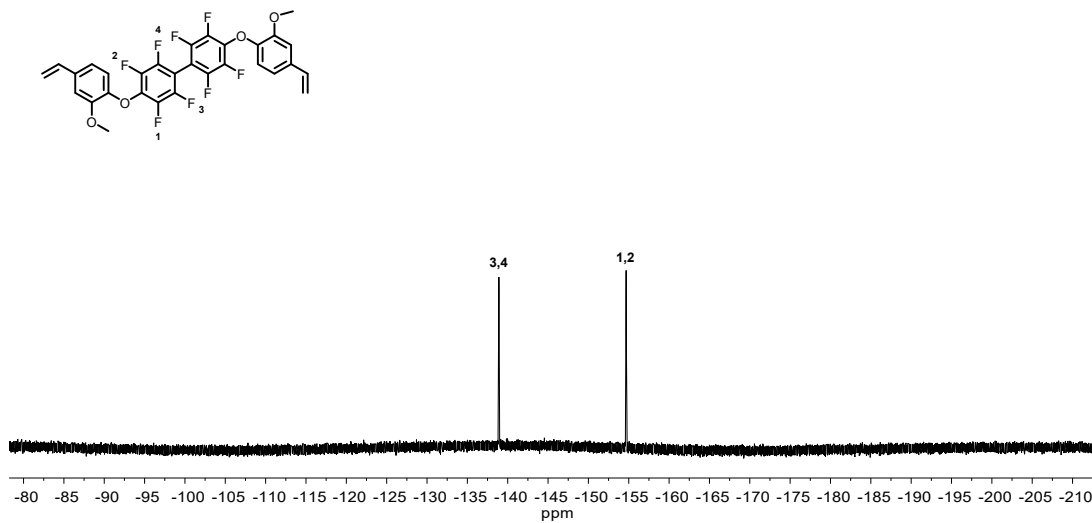

**Fig. S3**  $^{19}\text{F}$  NMR spectrum of monomer **M** (376 MHz,  $\text{CDCl}_3$ ).

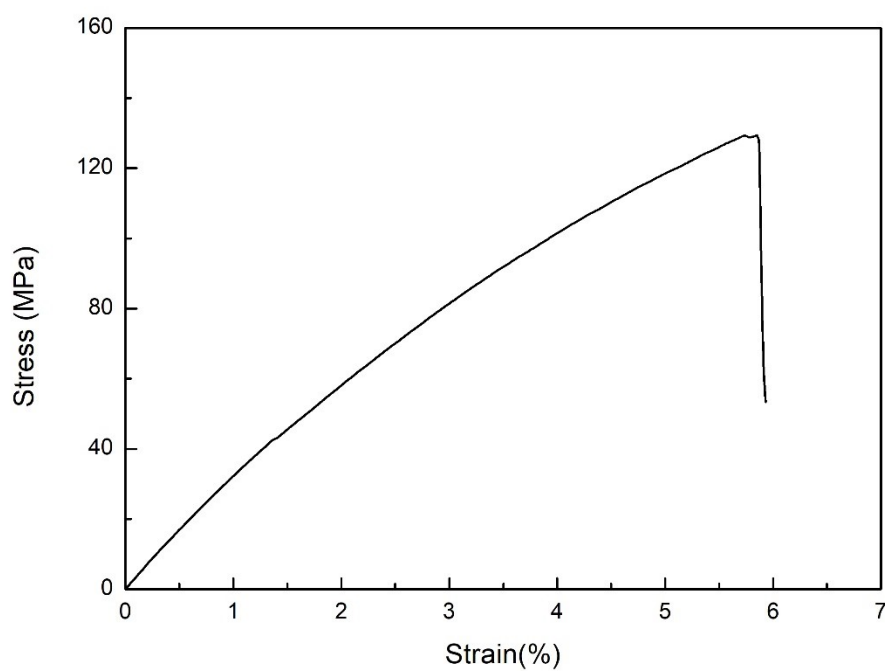

**Fig. S4** The stress-strain curves of **P** at room temperature.
